# Supplementary material for: CD8+ T Cells Mediate Lethal Lung Pathology in the Absence of PD-L1 and Type I Interferon Signalling following LCMV Infection
Source: MDPI journal article supplement (doi:10.3390/v16030390), 2024-03-01
Supplement: s1 [file s1]

## Supplementary Figures

### **Figure S1 Lethal pathology in DKO mice cannot be explained by plasma cytokine levels.**

Expression of cytokines and chemokines from the LEGENDplex™ Mouse Anti-Virus Response Panel in plasma isolated from WT, IFNAR1 KO, PD-L1 KO and IFNAR1 x PD-L1 DKO mice at day 8 post LCMV infection. Data is presented as mean  $\pm$  SEM from a one of two independent experiments with consistent results using at least five mice per group and experiment.

### **Figure S2 Treating IFNAR KO mice with anti-PD-L1 does not reinvigorate the CD8<sup>+</sup> T cell response.**

**(A, B)** Percent weight lost and clinical score of IFNAR1 KO treated with an isotype control or anti-PD-L1 i.p. three times weekly for two weeks beginning at day 15 **(A)** or 24 **(B)** p.i. ( $1 \times 10^3$  PFU; day 38 p.i.). **(C, D)** Bar plots showing the frequency of CD8<sup>+</sup> T cells expressing granzyme B, IFN- $\gamma$  and/or TNF after stimulation with LCMV GP<sub>33-41</sub> **(C)** or NP<sub>396-404</sub> **(D)**. T cells were isolated from the spleen of mice infected intraperitoneally with LCMV-Arm ( $2 \times 10^5$  PFU; day 38 p.i.). **(E)** LCMV-NP RNA levels in arbitrary units (a.u.), detected in the liver and CNS from mice infected with LCMV-Arm ( $1 \times 10^3$  PFU; day 38 p.i.) as determined by an RNase protection assay. Representative results from two independent experiments are shown.

**Figure S3 Gating strategy used to identify cell subsets in the lung of LCMV-infected WT, PD-L1 KO, IFNAR1 KO, IFNAR1 x PD-L1 DKO mice.** Representative plots are shown for DKO uninfected and LCMV-infected mice. As anti-Ly6G mAb treatment masks the fluorescent detection of Ly6G, neutrophils were gated as Ly6C<sup>int</sup>, CD48<sup>-</sup>, CD11b<sup>+</sup>. This comprises 98-99% of Ly6G<sup>+</sup> cells.

**Figure S4 Percent of neutrophils and CD8<sup>+</sup> T cells depleted in the blood of anti-CD8 or anti-GR1 and anti-Ly6G treated IFNAR1 x PD-L1 DKO mice at day 7 p.i..** **(A)** Percent of neutrophils out of total leukocytes in the blood of DKO mice infected with  $1 \times 10^3$  PFU LCMV and treated with anti-Ly6G

at day 7 p.i. **(B, C)** Number of neutrophils **(B)** and CD8<sup>+</sup> T cells **(C)**, their frequency out of total leukocytes and percent depleted in LCMV-infected DKO mice at day 8 p.i. that were untreated or treated with one or two isotype control mAbs, an anti-CD8 mAb or with anti-GR1 and anti-Ly6G mAbs. Numbers of neutrophils **(B)** and CD8<sup>+</sup> T cells **(C)** is shown with undepleted and isotype controls separate or aggregated as a single control group. Data is presented as mean  $\pm$  SEM with 3-5 mice per group.

**Figure S5 Expression of select genes in the lung and liver tissue of neutrophil- and CD8<sup>+</sup> T cell-depleted DKO LCMV-infected mice at day 7 p.i.** Gene expression values were normalized to *Rpl13a*. Data is presented as mean  $\pm$  SEM from a one experiment at least five mice per group and experiment.

Figure S1

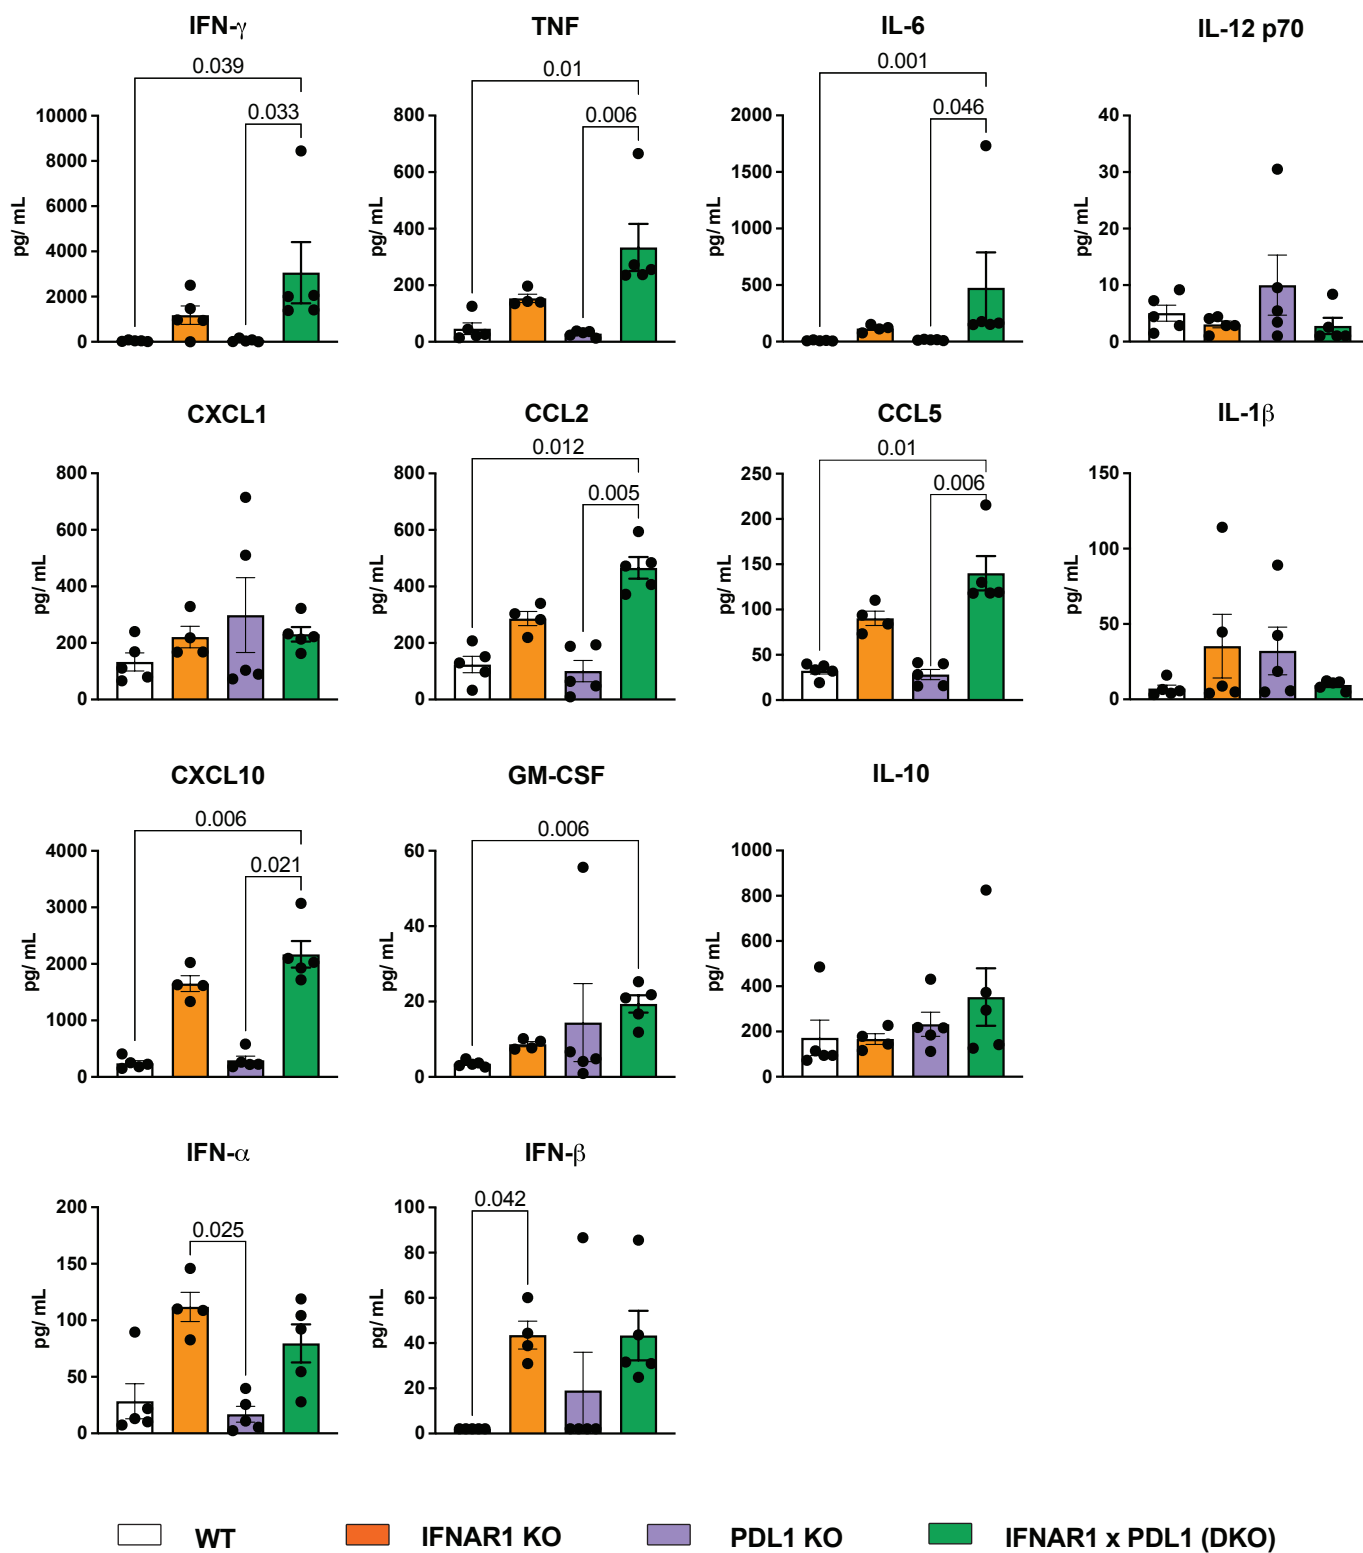

Figure S2

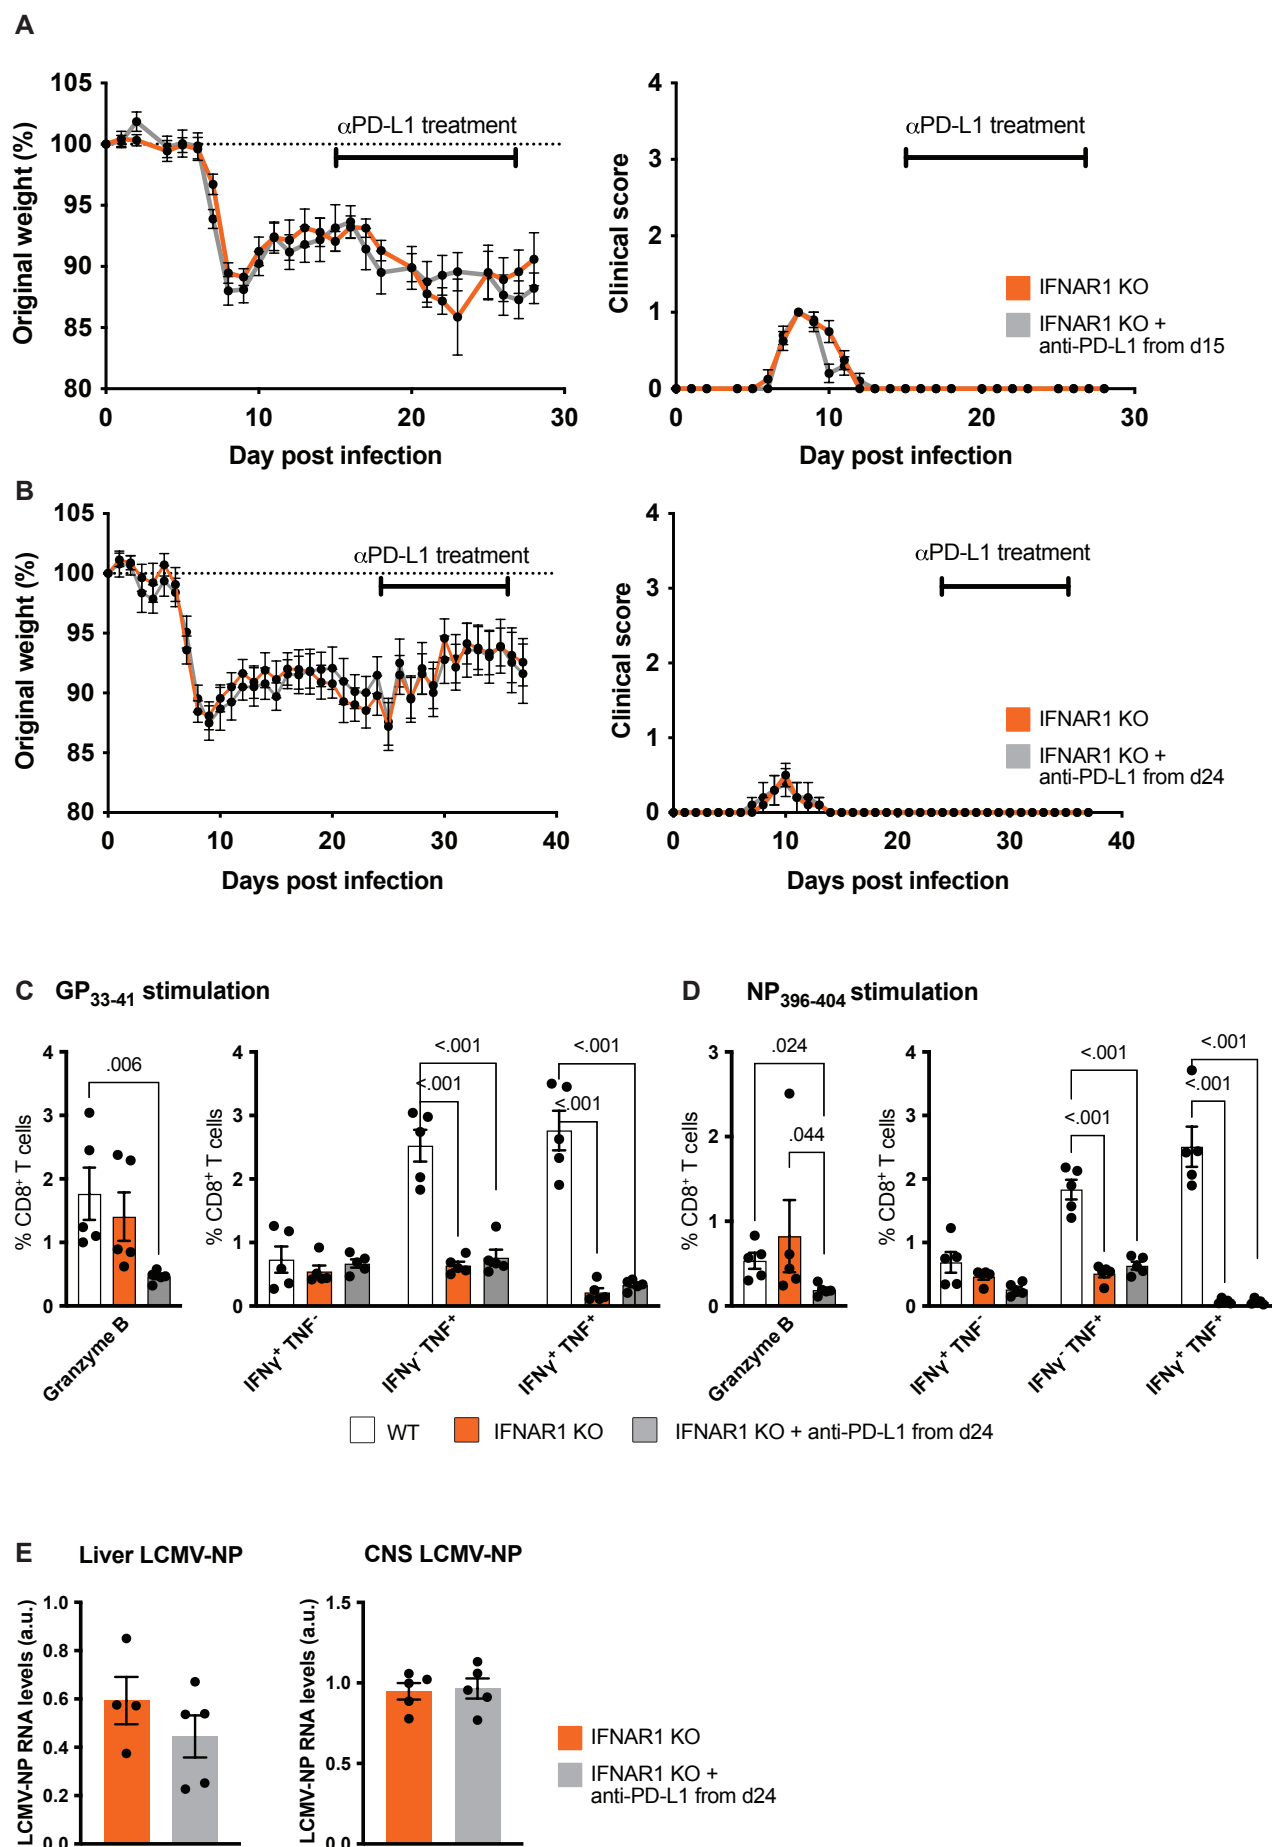

Figure S3

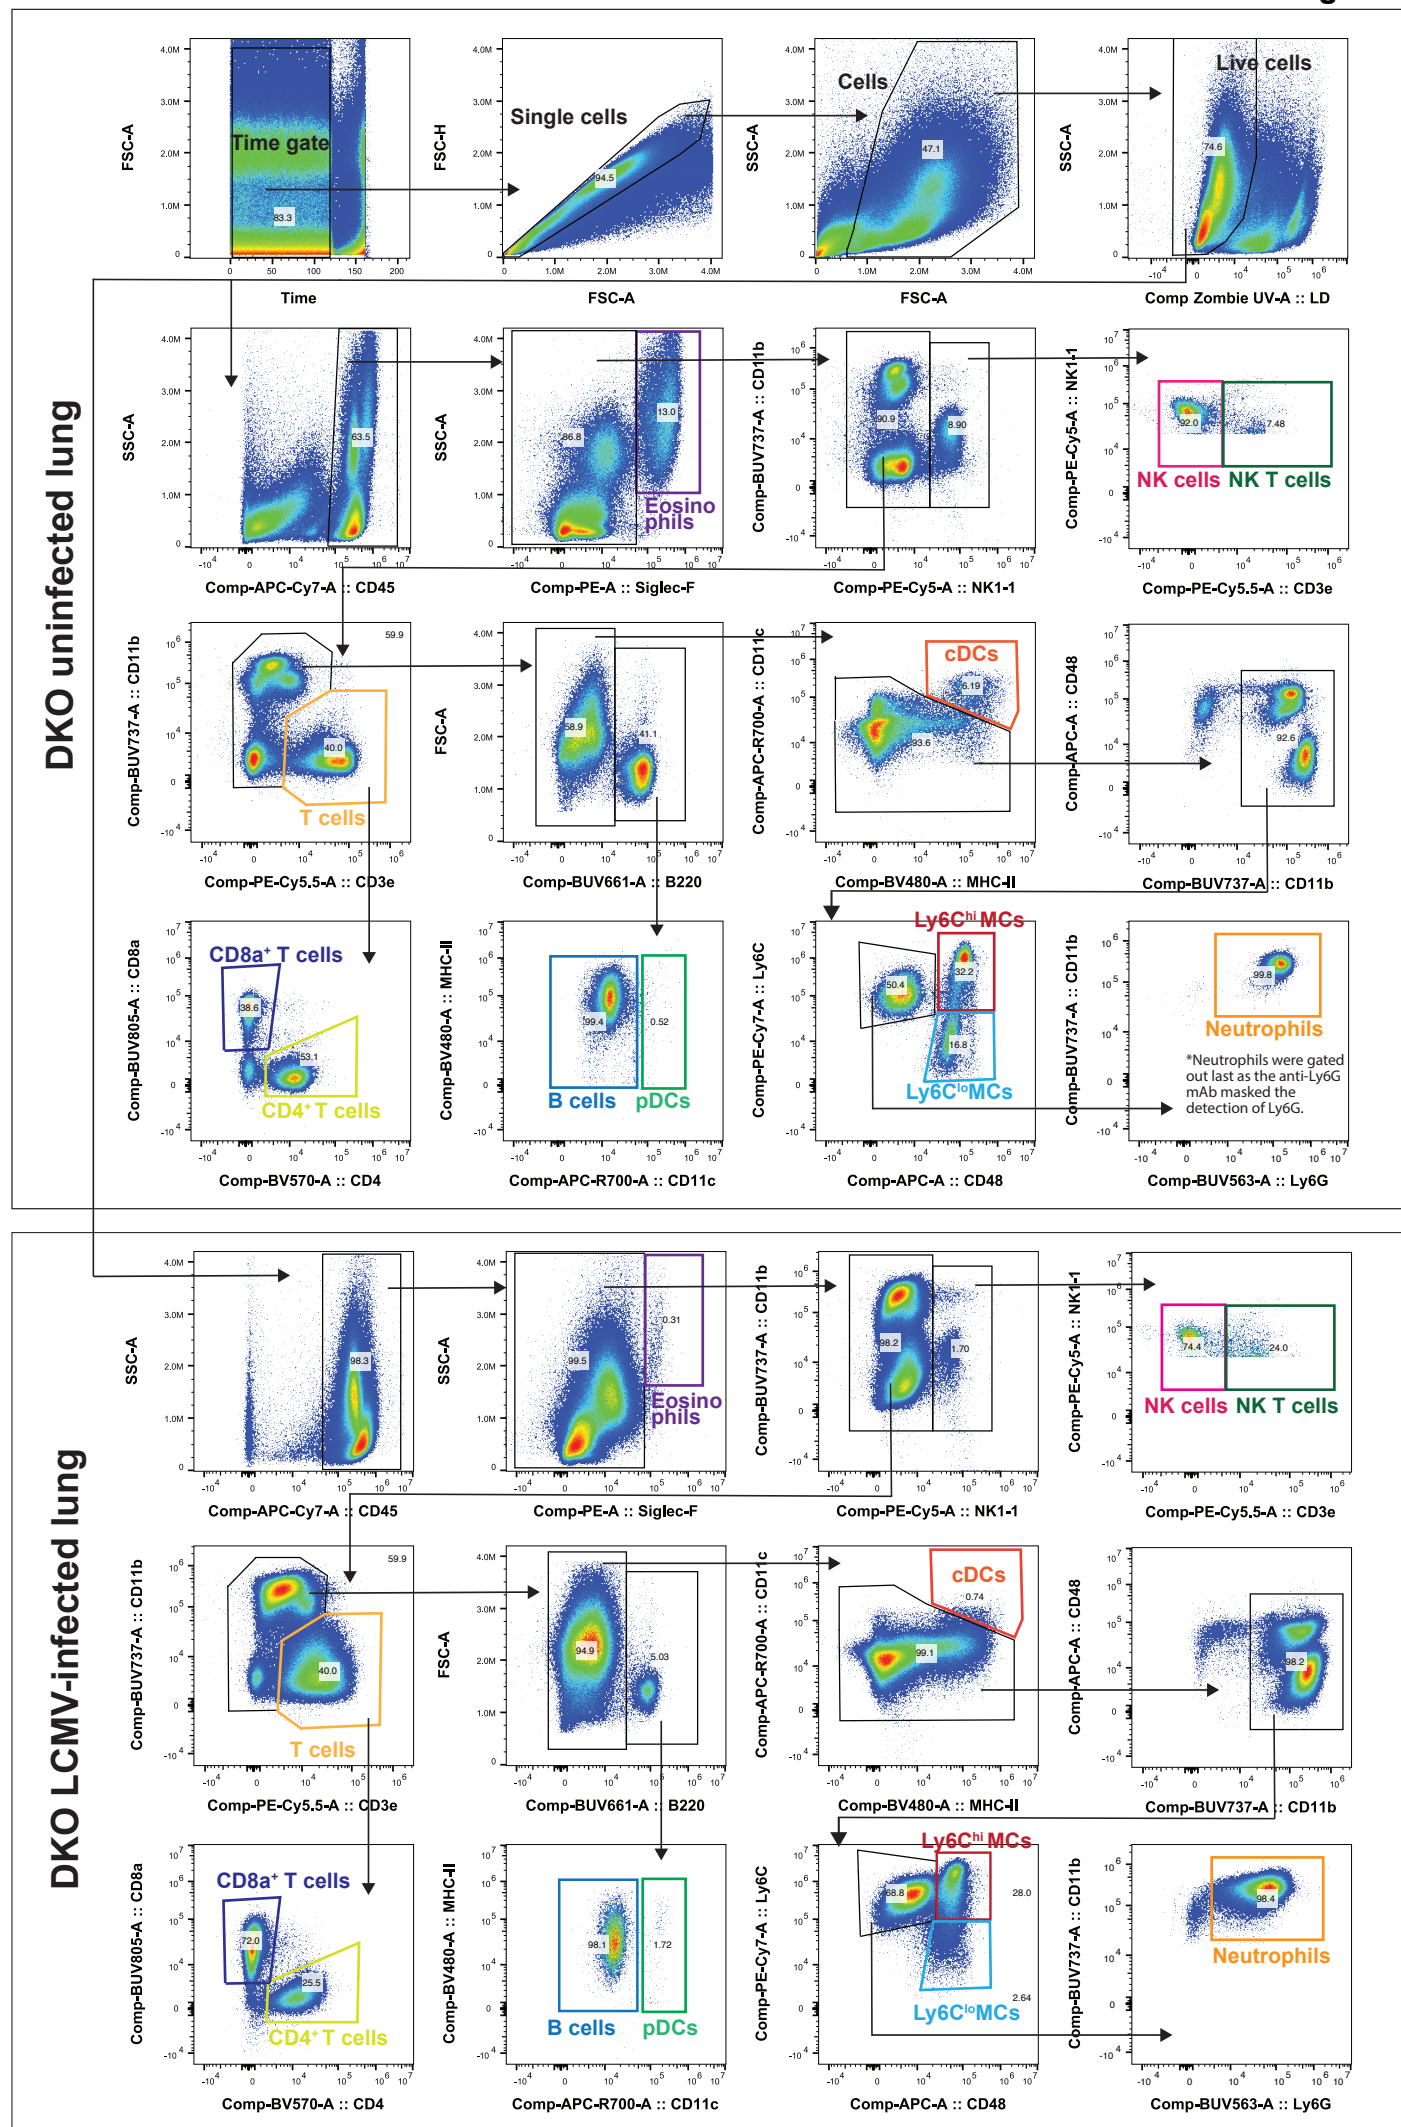

Figure S4

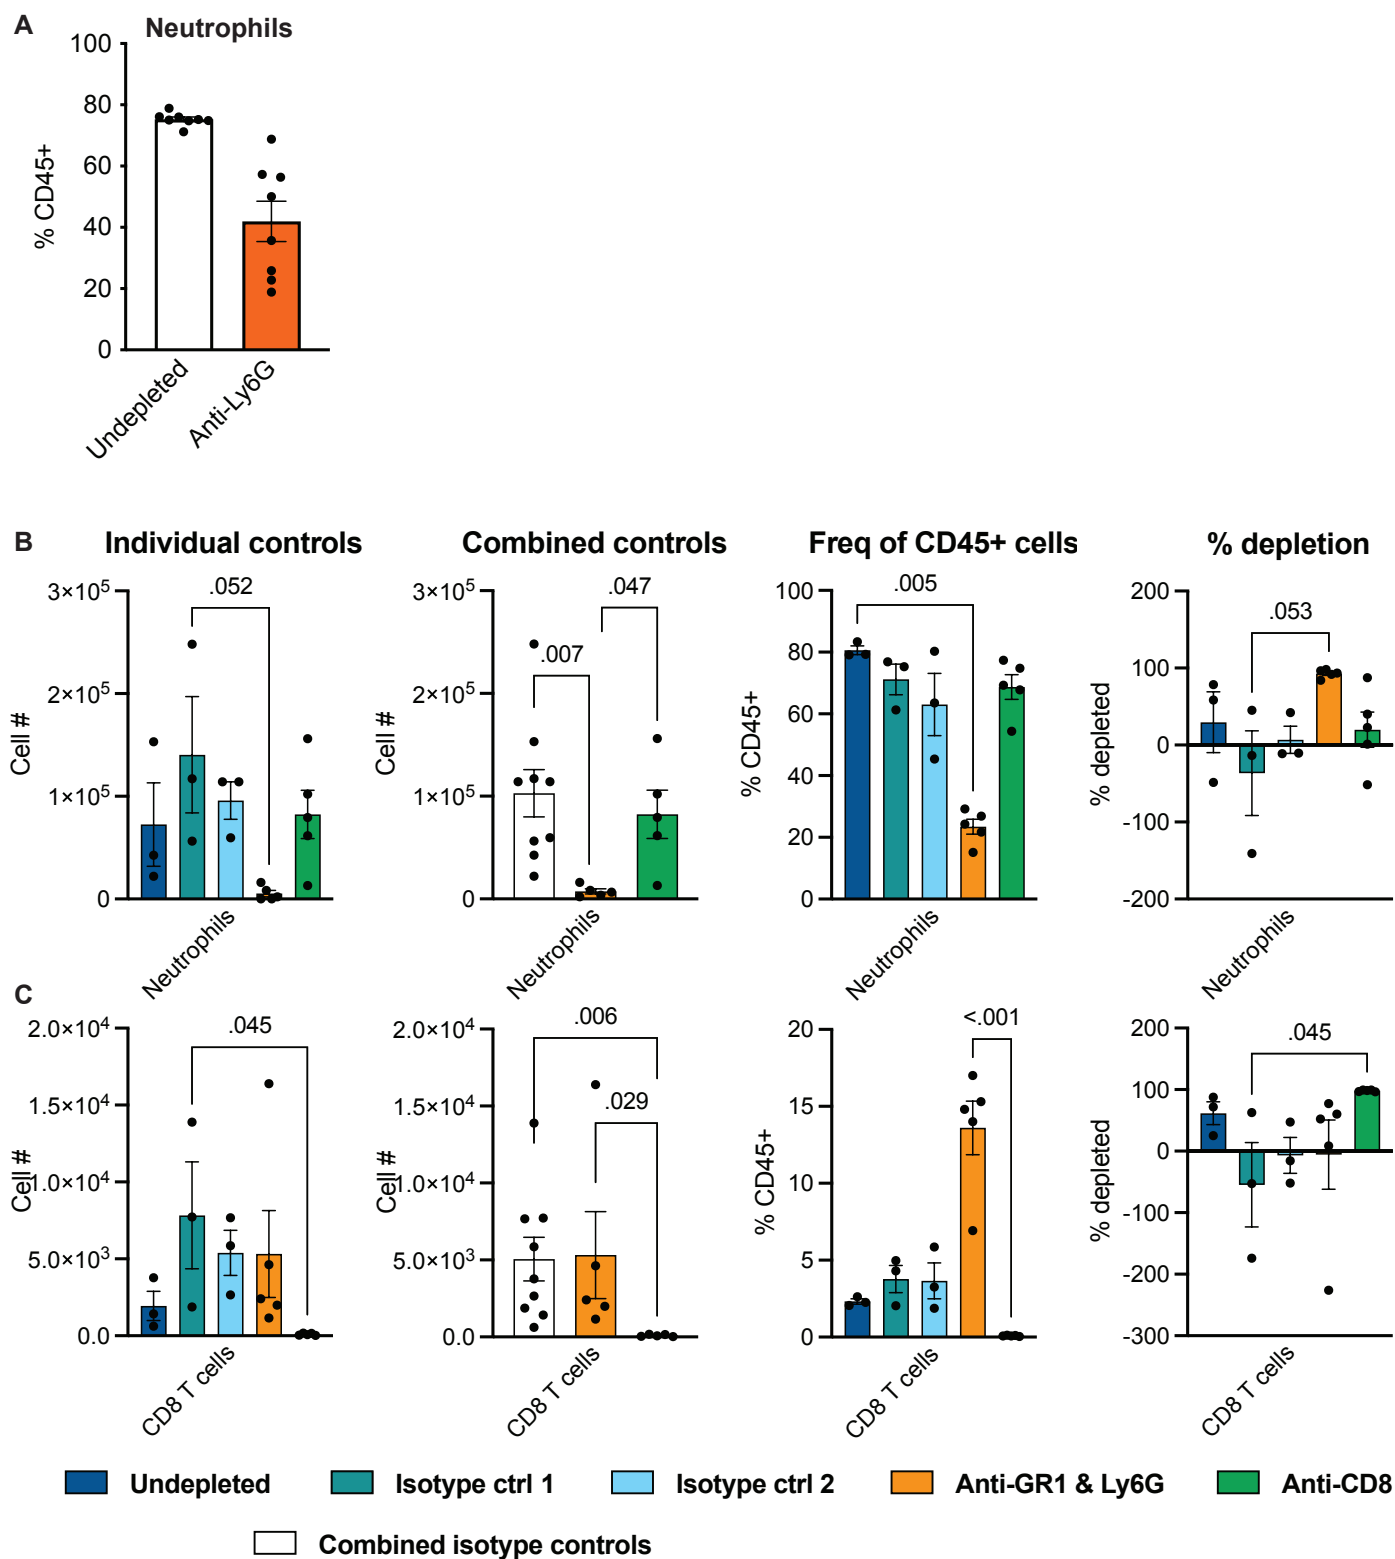

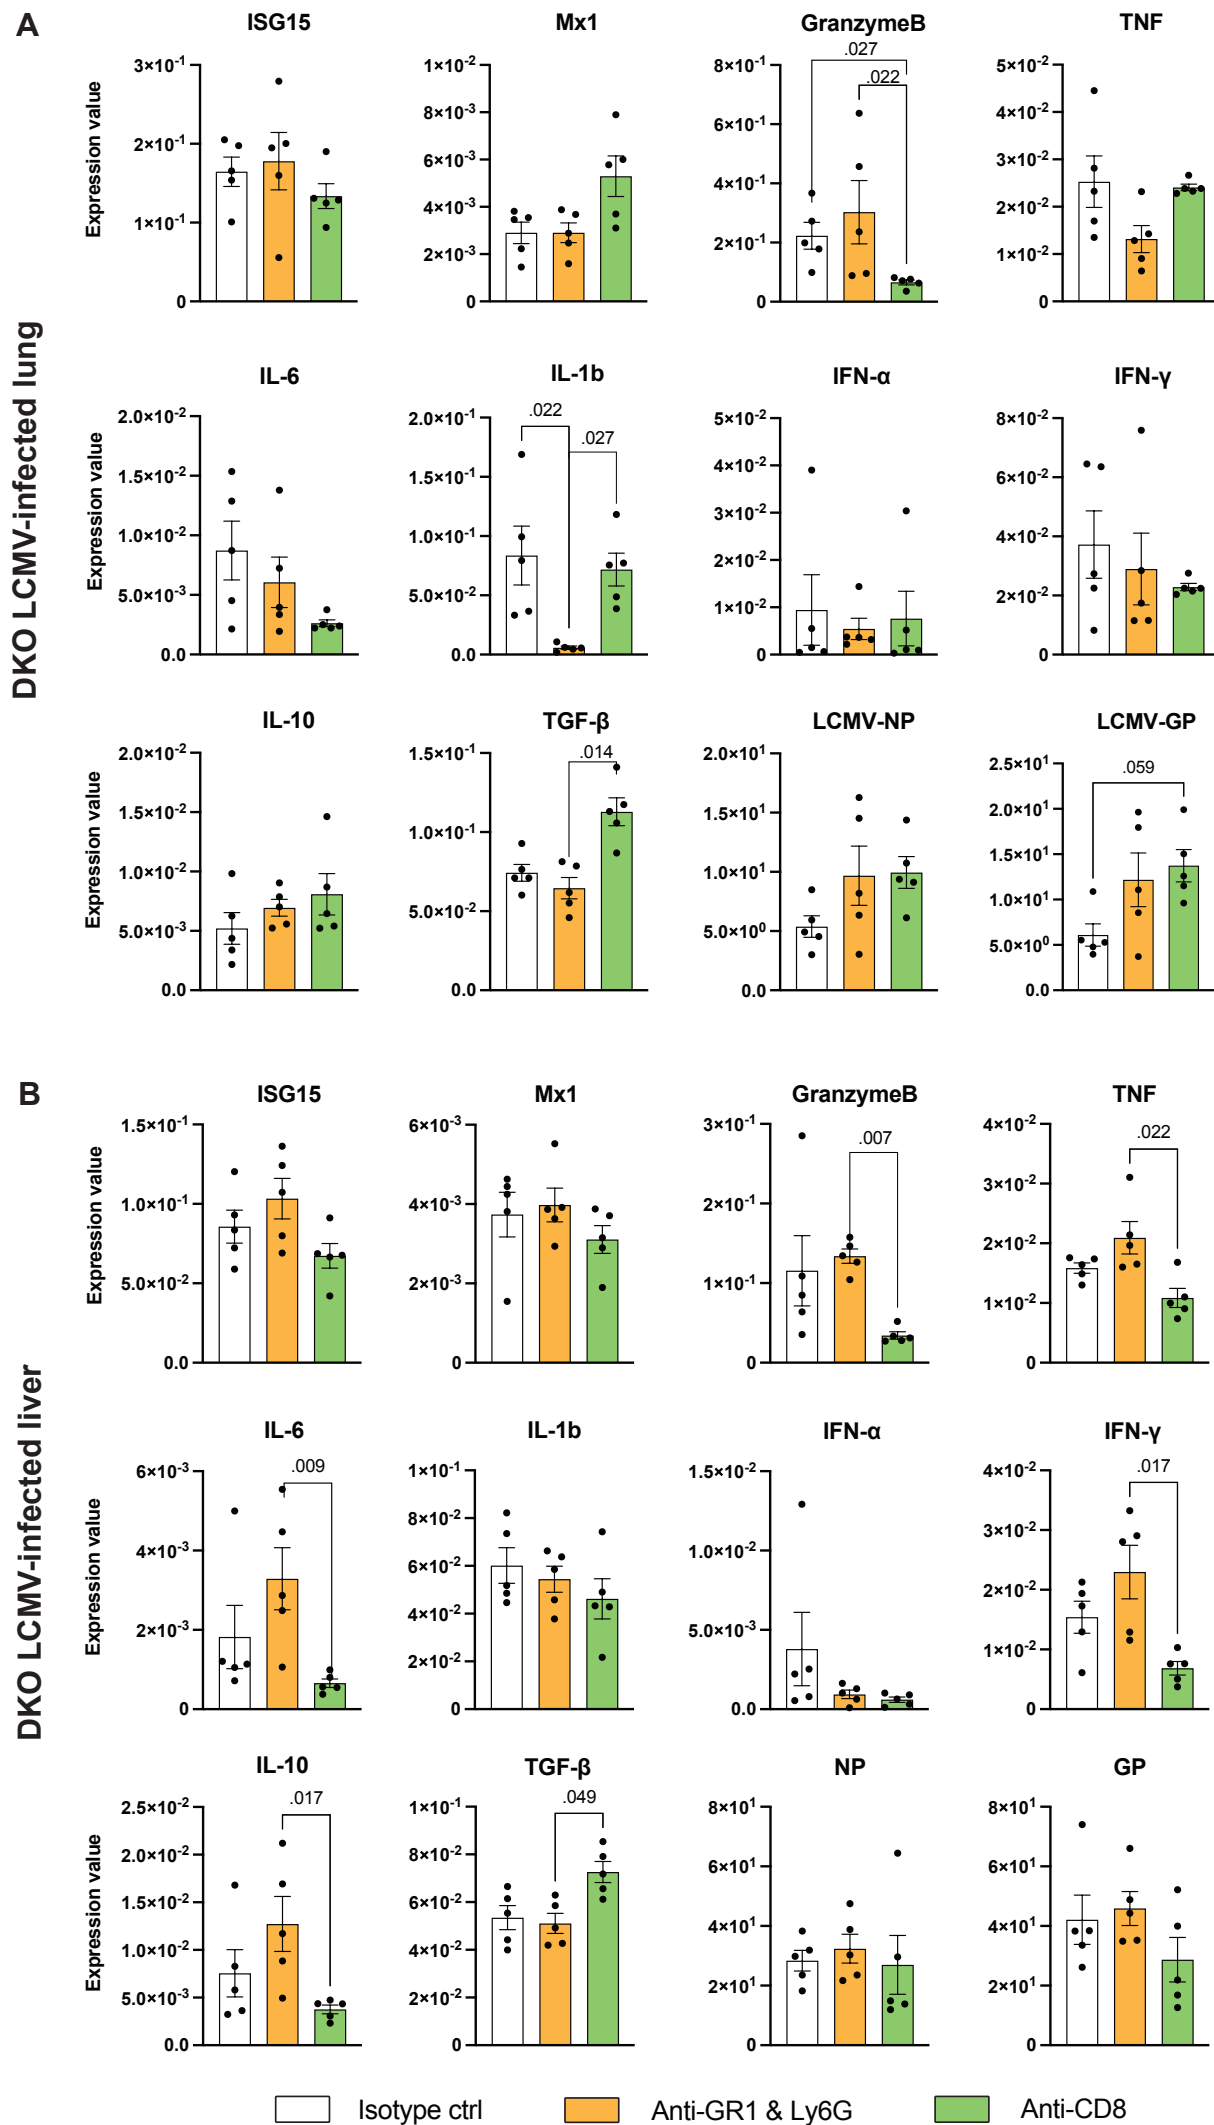

**Supplementary Table 1** Primers used for qPCR

| Gene                           | Sequence                                                            |
|--------------------------------|---------------------------------------------------------------------|
| <i>18S</i>                     | Forward CACGGCCGGTACAGTGAAAC<br>Reverse AGAGGAGCGAGCGACCAA          |
| <i>Granzyme B</i>              | Forward GCTGCTCACTGTGAAGGAAGTAT<br>Reverse GGGATGACTTGCTGGGTCTT     |
| <i>Ifn-<math>\gamma</math></i> | Forward GCAAAAGGATGGTGACATGA<br>Reverse TTCGCCTTGCTGTTGCTGA         |
| <i>Ifn-<math>\alpha</math></i> | Forward GTGACCTTCCTCAGACTCATAAC<br>Reverse GCACTGCCCAACTTGTCTAA     |
| <i>Il-1<math>\beta</math></i>  | Forward TGGACCTTCCAGGATGAGGACA<br>Reverse GTTCATCTCGGAGCCTGTAGTG    |
| <i>Il-10</i>                   | Forward AAGGGTTACTTGGGTTGCCA<br>Reverse AAATCGATGACAGCGCCTCAG       |
| <i>Il-6</i>                    | Forward CAAAGCCAGAGTCCTTCAGA<br>Reverse GATGGTCTTGGTCCTTAGCC        |
| <i>Irf7</i>                    | Forward GAGACTGGCTATTGGGGGAG<br>Reverse GACCGAAATGCTTCCAGGG         |
| <i>Isg15</i>                   | Forward GAGCTAGAGCCTGCAGCAAT<br>Reverse TTCTGGGCAATCTGCTTCTT        |
| <i>LCMV-GP</i>                 | Forward CATTACCTGGACTTTGTCAGACTC<br>Reverse GCAACTGCTGTGTTCCCGAAAC  |
| <i>LCMV-NP</i>                 | Forward CAGAAATGTTGATGCTGGACTGC<br>Reverse CAGACCTTGGCTTGCTTTACACAG |
| <i>Mx1</i>                     | Forward TCTGAGGAGAGCCAGACGAT<br>Reverse ACTCTGGTCCCCAATGACAG        |
| <i>Pkr</i>                     | Forward GTTGTTGGGAGGGAGTTGAC<br>Reverse AGAGGCACCGGGTTTTGTAT        |



|              |                                                                   |
|--------------|-------------------------------------------------------------------|
| <i>Tgf-β</i> | Forward GGAGAGCCCTGGATACCAAC<br>Reverse CAACCCAGGTCCTTCCTAAA      |
| <i>Tnf</i>   | Forward GGTGCCTATGTCTCAGCCTCTT<br>Reverse GCCATAGAACTGATGAGAGGGAG |

**Supplementary Table 2 Antibodies used for flow cytometry**

| Target Antigen                                         | Conjugate | Clone     | Company and Cat#       |
|--------------------------------------------------------|-----------|-----------|------------------------|
| <b>Spleen panels (ex vivo &amp; stimulation panel)</b> |           |           |                        |
| LAG-3                                                  | BV421     | C9B7W     | BioLegend, 125221      |
| CD45                                                   | BV510     | 30-F11    | BioLegend, 103138      |
| CD4                                                    | BV605     | GK1.5     | BioLegend, 100451      |
|                                                        | BV650     | RM4-5     | BioLegend, 100555      |
| CD179<br>(PD-1)                                        | BV711     | 29F.1A12  | BioLegend, 135231      |
| KLRG1<br>(MAFA)                                        | BV785     | 2F1/KLRG1 | BioLegend, 138429      |
| TNF                                                    | FITC      | MP6-XT22  | BioLegend, 506304      |
| CD44                                                   | FITC      | IM7       | BioLegend, 103006      |
| CD3e                                                   | PE/CF594  | 145-2C11  | BD Biosciences, 562332 |
| NK1.1                                                  | PE/Cy5    | PK136     | BioLegend, 108716      |
| IFN-γ                                                  | PE/Cy7    | XMG1.2    | BioLegend, 505826      |
| Dextramer<br>LCMV-GP                                   | APC       | NA        | Immudex, JA02160       |
| Dextramer<br>LCMV-NP                                   | APC       | NA        | Immudex, JA02142       |
| Granzyme B                                             | AF647     | GB11      | BioLegend, 515406      |
| CD8a                                                   | APC/Cy7   | 53-6.7    | BioLegend, 100714      |

| Lung panel |          |             |                            |
|------------|----------|-------------|----------------------------|
| F4/80      | BUV395   | T45-2342    | BD Biosciences, 565614     |
| Ly6G       | BUV563   | 1A8         | BD Biosciences, 565707     |
| B220       | BUV661   | RA3-6B2     | BD Biosciences, 565077     |
| CD11b      | BUV737   | M1/70       | BD Biosciences, 564443     |
| CD8a       | BUV805   | 53-6.7      | BD Biosciences, 564920     |
| MHC-II     | BV480    | M5/114.15.2 | BD Biosciences, 566088     |
| CD4        | BV570    | RM4-5       | BioLegend, 100542          |
| CD86       | BV605    | GL1         | BD Biosciences, 563055     |
| CD62L      | BV650    | MEL-14      | BD Biosciences, 564108     |
| PD-1       | BV711    | 29F.1A12    | BioLegend, 135231          |
| CD69       | BV786    | H1.2F3      | BD Biosciences, 564683     |
| Siglec-F   | PE       | E50-2440    | BD Biosciences, 552126     |
| CD115      | AF594    | AFS98       | BioLegend, 135520          |
| NK1.1      | PE/Cy5   | PK136       | BioLegend, 108716          |
| CD3e       | PE-Cy5.5 | 145-2C11    | BD Biosciences, 35-0031-82 |
| Ly6C       | PE/Cy7   | HK1.4       | BioLegend, 128018          |
| CD48       | APC      | HM48-1      | BioLegend, 103411          |
| CD11c      | APC R700 | N418        | BD Biosciences, 565872     |
| CD45       | APC/Cy7  | 30-F11      | BD Biosciences, 557659     |

| Blood panel |          |          |                        |
|-------------|----------|----------|------------------------|
| CD11b       | BUV395   | M1/70    | BD Biosciences, 563553 |
| CD8a        | BUV805   | 53-6.7   | BD Biosciences, 612898 |
| Siglec-F    | BV421    | E50-2440 | BD Biosciences, 562681 |
| CD4         | BV570    | RM4-5    | BioLegend, 100542      |
| Ly6C        | BV605    | HK1.4    | BioLegend, 128036      |
| Ly6G        | BV650    | 1A8      | BioLegend, 127641      |
| CD115       | PE       | AFS98    | Biolegend, 135506      |
| CD3e        | PE/Cy594 | 145-2C11 | BD Biosciences, 562286 |
| NK1.1       | PE/Cy5   | PK136    | BioLegend, 108716      |
| CD45        | AF700    | 30-F11   | BioLegend, 103128      |
| CD48        | APC/Cy7  | HM48-1   | BioLegend, 103432      |
